# Supplementary material
Source: PubMed Central journal article supplement (PMC4800000)
Supplement: NIHMS764634-supplement-supplement_1.pdf [file NIHMS764634-supplement-supplement_1.pdf]

**Supplemental Table 1: Western Blot (WB), immunofluorescence (IF), immunohistochemistry (IHC), and fluorescence-activated cell sorting (FACS) reagents**

| <b>Reagent</b>                                               | <b>Catalog Number</b>      | <b>Concentration</b> | <b>Usage</b> |
|--------------------------------------------------------------|----------------------------|----------------------|--------------|
| <b>Anti-HIF-1<math>\alpha</math></b>                         | NB100-449 (Novus)          | 1:500                | WB           |
| <b>Anti-HIF-1<math>\alpha</math></b>                         | NB100-479 (Novus)          | 1:100                | IHC          |
| <b>Anti-Actin</b>                                            | 612656 (BD)                | 1:2000               | WB           |
| <b>Anti-H3</b>                                               | 4499 (Cell Signaling)      | 1:2000               | WB           |
| <b>Anti-LC3 A/B</b>                                          | 12741 (Cell Signaling)     | 1:1000               | WB           |
| <b>Anti-BECLIN1</b>                                          | 3495 (Cell Signaling)      | 1:1000               | WB           |
| <b>Anti-ATG3</b>                                             | 3415 (Cell Signaling)      | 1:1000               | WB           |
| <b>CellROX Deep Red</b>                                      | C10422 (Life Technologies) | 5 $\mu$ M            | FACS         |
| <b>MitoTracker Deep Red</b>                                  | M22426 (Life Technologies) | 100nM                | FACS         |
| <b>MitoSOX Red</b>                                           | M36008 (Life Technologies) | 5 $\mu$ M            | FACS         |
| <b>Anti-EF5-Cy5</b>                                          | ELK3-51 (Cameron Koch)     | 1:2                  | IF           |
| <b>Hoechst 33342</b>                                         | H21492 (Life Technologies) | 20mg/ml              | IF           |
| <b>4',6-Diamidino-2-Phenylindole, Dihydrochloride (DAPI)</b> | D1306 (Life Technologies)  | 300nM                | IF           |
| <b>Anti-Annexin V-Alexa Fluor 647</b>                        | A23204 (Life Technologies) | 1:20                 | FACS         |
| <b>7-amino-actinomycin D (7-AAD)</b>                         | 559925 (BD)                | 1:20                 | FACS         |
| <b>LIVE/DEAD Fixable Violet Dead Cell Stain Kit</b>          | L34955 (Life Technologies) | 1:50000              | FACS         |
